# Supplementary material for: Mitogenomics of Chinch Bugs from China and Implications for Its Coevolutionary Relationship with Grasses
Source: MDPI journal article supplement (doi:10.3390/insects13070643), 2022-07-17
Supplement: s1 [file s1]

**Supplementary Materials for**  
**Mitogenomics of the chinch bugs from China and implications**  
**for its coevolutionary relationship with grasses**

Shujing Wang<sup>a</sup>, Runqi Zhu<sup>a</sup>, Huaijun Xue<sup>a</sup>, Yanfei Li<sup>a\*</sup>, Wenjun Bu<sup>a\*</sup>

a. Institute of Entomology, College of Life Sciences, Nankai University, Tianjin  
300071, PR China

\*Corresponding author.

E-mail address: wenjunbu@nankai.edu.cn (W.-J. Bu); liyanfei9412@163.com (Y.-F. Li)

**TABLE S1.** Experimental sample information of Blissidae.

| Number | species                       | Sample_ID | Latitude | Longitude |
|--------|-------------------------------|-----------|----------|-----------|
| 1      | <i>Bochrus foveatus</i>       | BoYNGL1   | 24.0969  | 97.8262   |
| 2      | <i>Capodemus sinuatus</i>     | CpYNRL1   | 24.0969  | 97.8262   |
| 3      | <i>Cavelerius yunnanensis</i> | CvYNLC1   | 23.0553  | 102.5331  |
| 4      | <i>Dimorphopterus gibbus</i>  | DmGXBS1   | 24.2790  | 106.2195  |
| 5      | <i>Iphicrates gressitti</i>   | IpZJLA1   | 30.1153  | 118.9892  |
| 6      | <i>Ischnodemus noctulus</i>   | IsYNRL1   | 24.0969  | 97.8262   |
| 7      | <i>Macropes harringtonae</i>  | MaGZZY1   | 27.6738  | 107.2768  |
| 8      | <i>Macropes dentipes</i>      | MaYNBN1   | 22.1100  | 100.3640  |
| 9      | <i>Macropes robustus</i>      | MaYNGL1   | 24.0969  | 97.8262   |
| 10     | <i>Pirkimerus japonicus</i>   | PiGXBS1   | 24.3890  | 106.4065  |

**TABLE S2.** Public data used in phylogenetic analysis.

| Superfamily    | Species                        | Accession number |
|----------------|--------------------------------|------------------|
| Lygaeoidea     | <i>Metatropis longirostris</i> | NC_037373        |
| Lygaeoidea     | <i>Yemmalysus parallelus</i>   | NC_012464        |
| Lygaeoidea     | <i>Phaenacantha marcida</i>    | NC_012460        |
| Lygaeoidea     | <i>Neolethaeus assamensis</i>  | NC_037375        |
| Pyrrhocoroidea | <i>Physopelta cincticollis</i> | NC_042433        |
| Pyrrhocoroidea | <i>Physopelta gutta</i>        | NC_012432        |
| Pyrrhocoroidea | <i>Antilochus coquebertii</i>  | NC_042441        |
| Pyrrhocoroidea | <i>Antilochus russus</i>       | NC_042440        |

**TABLE S3.** Best-fit models of sequence evolution and partitioning schemes selected by PartitionFinder for phylogenetic reconstructions.

|        |           | Best model Subset partitions                                       |
|--------|-----------|--------------------------------------------------------------------|
| Subset |           | Subset Best partitioning scheme for Mrbayes ( LnL= -79323.7575125) |
| 1      | GTR+I+G   | ND2, ND6, ATPase8, ND3,ATPase6,rRNA,tRNA                           |
| 2      | GTR+I+G   | CO1, CytB, CO2                                                     |
| 3      | K81UF+I+G | ND4L, ND1, ND4, ND5                                                |

**TABLE S4.** The nonsynonymous nucleotide changes (Ka) and the synonymous nucleotide changes (Ks) of PCGs.

|       | Ks     | Ka     | Ka/Ks  |
|-------|--------|--------|--------|
| ATP6  | 0.4439 | 0.1269 | 0.2859 |
| ATP8  | 0.5206 | 0.2732 | 0.5249 |
| COI   | 0.4647 | 0.0557 | 0.1198 |
| COII  | 0.4796 | 0.0903 | 0.1882 |
| COIII | 0.4832 | 0.1133 | 0.2345 |
| CYTB  | 0.5352 | 0.0996 | 0.1860 |
| ND1   | 0.3586 | 0.1160 | 0.3235 |
| ND2   | 0.4689 | 0.2136 | 0.4556 |
| ND3   | 0.4905 | 0.1324 | 0.2699 |
| ND4   | 0.3926 | 0.1732 | 0.4411 |
| ND4L  | 0.3741 | 0.1589 | 0.4246 |
| ND5   | 0.3410 | 0.1913 | 0.5609 |
| ND6   | 0.5084 | 0.2588 | 0.5090 |
